# Supplementary material for: Activation pathway of a G protein-coupled receptor uncovers conformational intermediates as novel targets for allosteric drug design
Source: Research Square preprint supplement (doi:10.21203/rs.3.rs-104911/v1), 2020-11-16
Supplement: Supplementary file 1 [file 10531ad63a506d2c27df8297.docx]

**Supporting Information**

**Activation pathway of a G protein-coupled receptor uncovers conformational intermediates as novel targets for allosteric drug design**

Xinheng He1,§, Zhao Yang2,§, Zong-Tao Chai3,§, Junyan Wang2, Ashfaq Ur Rehman1, Duan Ni4, Jun Pu5, Jinpeng Sun2,✉, Jian Zhang1,6✉, and Shaoyong Lu1,✉

1Department of Pathophysiology, Key Laboratory of Cell Differentiation and Apoptosis

of Chinese Ministry of Education, Shanghai Jiao Tong University, School of Medicine,

Shanghai 200025, China

2Department of Biochemistry and Molecular Biology, Key Laboratory Experimental Teratology of Chinese Ministry of Education, School of Medicine, Shandong University, Jinan, Shandong 250012, China

3Department of Hepatic Surgery VI, Eastern Hepatobiliary Surgery Hospital, Second Military Medical University, Shanghai 200438, China.

4The Charles Perkins Centre, University of Sydney, Sydney, NSW 2006, Australia

5Department of Cardiology, Renji Hospital, Shanghai Jiao Tong University, School of Medicine, Shanghai 200120, China

6School of Pharmaceutical Sciences, Zhengzhou University, Zhengzhou 450001, China

§These authors contributed equally to this work.

✉To whom correspondence should be addressed:

Dr. Shaoyong Lu; E-mail: [lushaoyong@yeah.net](mailto:lushaoyong@yeah.net)

Dr. Jian Zhang; E-mail: [jian.zhang@sjtu.edu.cn](mailto:jian.zhang@sjtu.edu.cn)

Dr. Jinpeng Sun; E-mail: [sunjinpeng@sdu.edu.cn](mailto:sunjinpeng@sdu.edu.cn)

**Section 1:** Convergence Test for Free Energy Landscapes

**Section 2:** Analysis of Reported Class A GPCRs

**Section 3:** Validation of Markov State Model Based on the Activation Parameters

**Section 4:** Secondary Structure of Different Macrostates

**Section 5:** Community Dynamics and Signal Transmission of Each State

**Section 6:** TICA Analysis of Trajectories

**Section 7:** The Construction of the AT1R-transducer System

**Section 8:** Pocket Location in Three Macrostates

**Section 9:** The Expression Level of Mutant AT1R Measured by ELISA

**Section 1: Convergence Test for Free Energy Landscapes**

To confirm that the length of trajectories and the number of rounds are sufficient for a stable free energy landscape and transition pathway, we designed convergence tests via changing trajectory length and round number respectively. In length test shown in Fig. S1, we truncated the 150 trajectories into varied subsets and plotted corresponding free energy landscapes, namely 225 μs (1.5 μs*150, Fig. S1A), 240 μs (1.6 μs*150, Fig. S1B), 255 μs (1.7 μs*150, Fig. S1C), 270 μs (1.8 μs*150, Fig. S1D), 285 μs (1.9 μs*150, Fig. S1E), and 300 μs (2.0 μs*150, Fig. S1F). We also change the rounds of simulation in Fig. S2 and obtained free energy landscapes of 240 μs (2.0 μs*8*15, Fig. S2A), 270 μs (2.0 μs*9*15, Fig. S2B), and original 300 μs (2.0 μs*10*15, Fig. S2C). With the same parameters, all subfigures show highly similar appearance and conformational distribution, confirming that both current trajectory timescale and simulation round are enough to explore the activation pathway of AT1R.


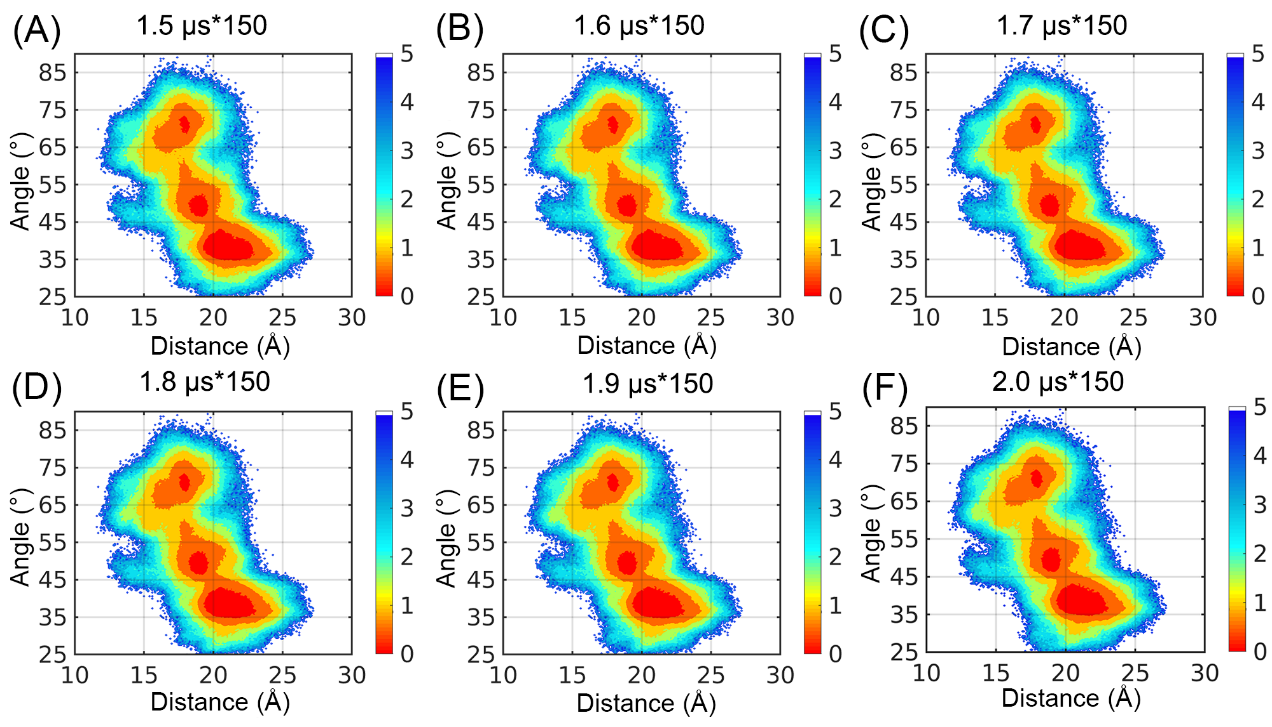


**Fig. S1** Free energy landscapes for different trajectory length (225 μs in (A), 240 μs in (B), 255 μs in (C), 270 μs in (D), 285 μs in (E), and 300 μs in (F)) in the convergence test.


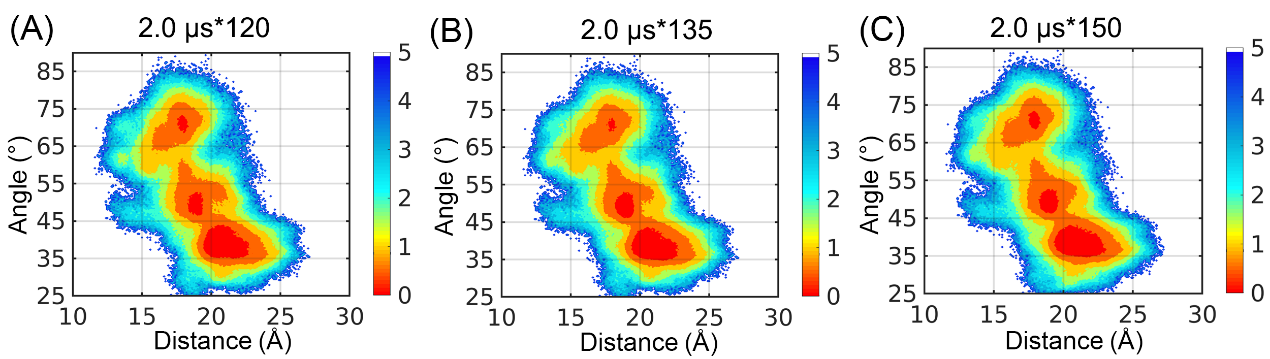


**Fig. S2** Free energy landscapes for different system rounds (8 rounds in (A), 9 rounds in (B), and 10 rounds in (C)) in the convergence test.

**Section 2: Analysis of Reported Class A GPCRs**

To confirm the activation pathway of AT1R discovered by our extensive MD simulations, we also collected currently published class A GPCR structures, measured their activation parameters (distance between L5.55 and N7.46; angle among V2.41, S6.47, and F6.34), and projected them to the free energy landscape. Table S1 shows the statistical data of all collected GPCRs. The state of protein referred to the gpcrdb database1.

**Table S1.** Summary of current reported class A GPCRs

| *PDB ID* | *Resolution(*Å*)* | *Protein name* | *Methods* | *Substrate* | *Ligand* | *Allosteric Modulator* | *Activity* | *Distance (Å)* | *Angle*  *(°)* |
| --- | --- | --- | --- | --- | --- | --- | --- | --- | --- |
| 6G79 | 3.8 | 5-HT1B receptor | Electron Microscopy | mini-Go | donitriptan | No | Active | 19.23 | 59.66 |
| 4IAQ | 2.8 | 5-HT1B receptor | X-Ray Diffraction | No | dihydroergotamine | No | Intermediate | 20.68 | 39.26 |
| 4IAR | 2.7 | 5-HT1B receptor | X-Ray Diffraction | No | ergotamine | No | Intermediate | 19.82 | 43.90 |
| 5V54 | 3.9 | 5-HT1B receptor | X-Ray Diffraction | No | CHEMBL428892 | No | Intermediate | 18.69 | 42.68 |
| 6A93 | 3.0 | 5-HT2A receptor | X-Ray Diffraction | No | risperidone | No | Inactive | 19.73 | 34.19 |
| 6A94 | 2.9 | 5-HT2A receptor | X-Ray Diffraction | No | zotepine | No | Inactive | 19.80 | 32.85 |
| 5TUD | 3.0 | 5-HT2B receptor | X-Ray Diffraction | No | ergotamine | No | Active | 20.02 | 53.99 |
| 4IB4 | 2.7 | 5-HT2B receptor | X-Ray Diffraction | No | ergotamine | No | Intermediate | 18.94 | 41.24 |
| 4NC3 | 2.8 | 5-HT2B receptor | X-Ray Diffraction | No | ergotamine | No | Intermediate | 19.00 | 42.33 |
| 5TVN | 2.9 | 5-HT2B receptor | X-Ray Diffraction | No | lysergide | No | Intermediate | 18.59 | 44.09 |
| 6DRX | 3.1 | 5-HT2B receptor | X-Ray Diffraction | No | lisuride | No | Intermediate | 18.89 | 40.99 |
| 6DRY | 2.9 | 5-HT2B receptor | X-Ray Diffraction | No | methylergonovine | No | Intermediate | 18.85 | 44.02 |
| 6DRZ | 3.1 | 5-HT2B receptor | X-Ray Diffraction | No | methysergide | No | Intermediate | 18.86 | 43.27 |
| 6DS0 | 3.2 | 5-HT2B receptor | X-Ray Diffraction | No | LY266097 | No | Intermediate | 18.76 | 41.88 |
| 6BQG | 3.0 | 5-HT2C receptor | X-Ray Diffraction | No | ergotamine | No | Active | 19.76 | 54.37 |
| 6BQH | 2.7 | 5-HT2C receptor | X-Ray Diffraction | No | ritanserin | No | Inactive | 19.41 | 34.62 |
| 6D9H | 3.6 | A1R | Electron Microscopy | Gi2 | ADO | No | Active | 19.54 | 68.17 |
| 5N2S | 3.3 | A1R | X-Ray Diffraction | No | PSB36 | No | Inactive | 20.89 | 43.27 |
| 5UEN | 3.2 | A1R | X-Ray Diffraction | No | CHEMBL144360 | No | Inactive | 20.32 | 39.11 |
| 5G53 | 3.4 | A2AR | X-Ray Diffraction | mini-Gs-GDP | NECA | No | Active | 18.99 | 71.28 |
| 6GDG | 4.1 | A2AAR | Electron Microscopy | mini-Gs | NECA | No | Active | 18.90 | 71.92 |
| 3EML | 2.6 | A2AAR | X-Ray Diffraction | No | ZM241385 | No | Inactive | 20.48 | 40.87 |
| 3PWH | 3.3 | A2AAR | X-Ray Diffraction | No | ZM241385 | No | Inactive | 20.35 | 40.73 |
| 3REY | 3.3 | A2AAR | X-Ray Diffraction | No | XAC | No | Inactive | 19.93 | 40.20 |
| 3RFM | 3.6 | A2AAR | X-Ray Diffraction | No | caffeine | No | Inactive | 20.16 | 40.30 |
| 3UZA | 3.3 | A2AAR | X-Ray Diffraction | No | CHEMBL2024115 | No | Inactive | 19.97 | 40.52 |
| 3UZC | 3.3 | A2AAR | X-Ray Diffraction | No | CHEMBL2024114 | No | Inactive | 20.06 | 40.56 |
| 3VG9 | 2.7 | A2AAR | X-Ray Diffraction | No | ZM241385 | Fab2838 | Inactive | 19.93 | 41.72 |
| 3VGA | 3.1 | A2AAR | X-Ray Diffraction | No | ZM241385 | Fab2838 | Inactive | 20.55 | 41.60 |
| 4EIY | 1.8 | A2AAR | X-Ray Diffraction | No | ZM241385 | Na+ | Inactive | 20.63 | 43.07 |
| 5IU4 | 1.7 | A2AAR | X-Ray Diffraction | No | ZM241385 | No | Inactive | 20.68 | 42.50 |
| 5IU7 | 1.9 | A2AAR | X-Ray Diffraction | No | 6DY | No | Inactive | 20.63 | 42.49 |
| 5IU8 | 2.0 | A2AAR | X-Ray Diffraction | No | CHEMBL3934661 | No | Inactive | 20.82 | 42.16 |
| 5IUA | 2.2 | A2AAR | X-Ray Diffraction | No | 6DX | No | Inactive | 20.75 | 42.61 |
| 5IUB | 2.1 | A2AAR | X-Ray Diffraction | No | CHEMBL184061 | No | Inactive | 20.66 | 42.31 |
| 5JTB | 2.8 | A2AAR | X-Ray Diffraction | No | ZM241385 | No | Inactive | 20.78 | 42.94 |
| 5K2A | 2.5 | A2AAR | X-Ray Diffraction | No | ZM241385 | No | Inactive | 20.83 | 42.41 |
| 5K2B | 2.5 | A2AAR | X-Ray Diffraction | No | 139180-30-6 | No | Inactive | 20.89 | 42.59 |
| 5K2C | 1.9 | A2AAR | X-Ray Diffraction | No | ZM241385 | No | Inactive | 20.84 | 42.92 |
| 5K2D | 1.9 | A2AAR | X-Ray Diffraction | No | ZM241385 | No | Inactive | 20.83 | 42.91 |
| 5MZJ | 2.0 | A2AAR | X-Ray Diffraction | No | theophylline | No | Inactive | 20.65 | 42.69 |
| 5MZP | 2.1 | A2AAR | X-Ray Diffraction | No | caffeine | No | Inactive | 20.62 | 43.06 |
| 5N2R | 2.8 | A2AAR | X-Ray Diffraction | No | PSB36 | No | Inactive | 20.76 | 43.28 |
| 5NLX | 2.1 | A2AAR | X-Ray Diffraction | No | ZM241385 | No | Inactive | 20.87 | 50.92 |
| 5NM2 | 2.0 | A2AAR | X-Ray Diffraction | No | 139180-30-6 | No | Inactive | 20.75 | 42.47 |
| 5NM4 | 1.7 | A2AAR | X-Ray Diffraction | No | ZM241385 | No | Inactive | 20.67 | 50.75 |
| 5OLG | 1.9 | A2AAR | X-Ray Diffraction | No | ZM241385 | No | Inactive | 20.67 | 42.50 |
| 5OLH | 2.6 | A2AAR | X-Ray Diffraction | No | vipadenant | No | Inactive | 20.77 | 42.50 |
| 5OLO | 3.1 | A2AAR | X-Ray Diffraction | No | tozadenant | No | Inactive | 20.55 | 42.58 |
| 5OLV | 2.0 | A2AAR | X-Ray Diffraction | No | CHEMBL1671936 | No | Inactive | 20.68 | 42.51 |
| 5OLZ | 1.9 | A2AAR | X-Ray Diffraction | No | CHEMBL2024114 | No | Inactive | 20.65 | 42.45 |
| 5OM1 | 2.1 | A2AAR | X-Ray Diffraction | No | CHEMBL2024114 | No | Inactive | 20.71 | 42.50 |
| 5OM4 | 2.0 | A2AAR | X-Ray Diffraction | No | CHEMBL2024114 | No | Inactive | 20.65 | 42.61 |
| 5UIG | 3.5 | A2AAR | X-Ray Diffraction | No | J3.651.884G | No | Inactive | 18.66 | 48.11 |
| 5UVI | 3.2 | A2AAR | X-Ray Diffraction | No | ZM241385 | No | Inactive | 20.71 | 42.75 |
| 5VRA | 2.4 | A2AAR | X-Ray Diffraction | No | ZM241385 | No | Inactive | 20.62 | 43.44 |
| 6AQF | 2.5 | A2AAR | X-Ray Diffraction | No | ZM241385 | No | Inactive | 20.89 | 43.10 |
| 6GT3 | 2.0 | A2AAR | X-Ray Diffraction | No | AZD4635 | No | Inactive | 20.78 | 42.31 |
| 6MH8 | 4.2 | A2AAR | X-Ray Diffraction | No | ZM241385 | No | Inactive | 20.80 | 42.03 |
| 2YDO | 3.0 | A2AAR | X-Ray Diffraction | No | adenosine | No | Intermediate | 18.77 | 54.62 |
| 2YDV | 2.6 | A2AAR | X-Ray Diffraction | No | NECA | No | Intermediate | 18.68 | 54.56 |
| 3QAK | 2.7 | A2AAR | X-Ray Diffraction | No | UK-432097 | No | Intermediate | 17.81 | 52.07 |
| 4UG2 | 2.6 | A2AAR | X-Ray Diffraction | No | Cgs 21680 | No | Intermediate | 18.70 | 53.28 |
| 4UHR | 2.6 | A2AAR | X-Ray Diffraction | No | Cgs 21680 | No | Intermediate | 18.54 | 54.64 |
| 5WF5 | 2.6 | A2AAR | X-Ray Diffraction | No | UK-432,097 | No | Intermediate | 18.51 | 53.83 |
| 5WF6 | 2.9 | A2AAR | X-Ray Diffraction | No | UK-432,097 | No | Intermediate | 18.88 | 53.14 |
| 5VBL | 2.6 | APJR | X-Ray Diffraction | No | AMG3054 | No | Inactive | 21.30 | 41.29 |
| 4ZUD | 2.8 | AT1R | X-Ray Diffraction | No | OLM | No | Inactive | 21.67 | 36.57 |
| 5UNF | 2.8 | AT2R | X-Ray Diffraction | No | CHEMBL289472 | No | Active | 19.01 | 62.78 |
| 5UNG | 2.8 | AT2R | X-Ray Diffraction | No | CHEMBL289472 | No | Active | 19.17 | 61.94 |
| 5UNH | 2.9 | AT2R | X-Ray Diffraction | No | 8EM | No | Active | 19.30 | 62.21 |
| 5XJM | 3.2 | AT2R | X-Ray Diffraction | No | (Sar1,Ile8)-Angiotensin II | No | Active | 18.94 | 61.82 |
| 6H7J | 2.8 | β1AR | X-Ray Diffraction | No | isoprenaline | No | Active | 19.63 | 59.13 |
| 6H7L | 2.7 | β1AR | X-Ray Diffraction | No | dobutamine | No | Active | 19.69 | 67.84 |
| 6H7M | 2.8 | β1AR | X-Ray Diffraction | No | salbutamol | No | Active | 19.68 | 68.43 |
| 6H7N | 2.5 | β1AR | X-Ray Diffraction | No | xamoterol | No | Active | 19.76 | 68.44 |
| 6H7O | 2.8 | β1AR | X-Ray Diffraction | No | SCHEMBL21067985 | No | Active | 19.54 | 68.14 |
| 6IBL | 2.7 | β1AR | X-Ray Diffraction | No | formoterol | No | Active | 19.77 | 68.23 |
| 2VT4 | 2.7 | β1AR | X-Ray Diffraction | No | cyanopindolol | No | Inactive | 19.78 | 41.15 |
| 2Y00 | 2.5 | β1AR | X-Ray Diffraction | No | dobutamine(dob92) | No | Inactive | 20.11 | 41.63 |
| 2Y01 | 2.6 | β1AR | X-Ray Diffraction | No | dobutamine(dob102) | No | Inactive | 20.04 | 41.97 |
| 2Y02 | 2.6 | β1AR | X-Ray Diffraction | No | carmoterol | No | Inactive | 19.98 | 41.28 |
| 2Y03 | 2.9 | β1AR | X-Ray Diffraction | No | isoprenaline | No | Inactive | 20.02 | 41.61 |
| 2Y04 | 3.1 | β1AR | X-Ray Diffraction | No | salbutamol | No | Inactive | 20.00 | 41.38 |
| 2YCW | 3.0 | β1AR | X-Ray Diffraction | No | carazolol | No | Inactive | 19.57 | 40.82 |
| 2YCX | 3.3 | β1AR | X-Ray Diffraction | No | cyanopindolol | No | Inactive | 19.65 | 38.91 |
| 2YCY | 3.2 | β1AR | X-Ray Diffraction | No | cyanopindolol | No | Inactive | 19.73 | 39.35 |
| 2YCZ | 3.7 | β1AR | X-Ray Diffraction | No | iodocyanopindolol | No | Inactive | 19.62 | 39.99 |
| 3ZPQ | 2.8 | β1AR | X-Ray Diffraction | No | CHEMBL200234 | No | Inactive | 19.91 | 41.60 |
| 3ZPR | 2.7 | β1AR | X-Ray Diffraction | No | CHEMBL1559535 | No | Inactive | 19.91 | 34.23 |
| 4AMI | 3.2 | β1AR | X-Ray Diffraction | No | bucindolol | No | Inactive | 21.44 | 39.88 |
| 4AMJ | 2.3 | β1AR | X-Ray Diffraction | No | carvedilol | No | Inactive | 19.95 | 41.75 |
| 4BVN | 2.1 | β1AR | X-Ray Diffraction | No | carvedilol | Na+ | Inactive | 19.38 | 38.91 |
| 4GPO | 3.5 | β1AR | X-Ray Diffraction | No | No | No | Inactive | 19.82 | 40.35 |
| 5A8E | 2.4 | β1AR | X-Ray Diffraction | No | 7-methylcyanopindolol | No | Inactive | 19.54 | 39.23 |
| 5F8U | 3.4 | β1AR | X-Ray Diffraction | No | cyanopindolol | No | Inactive | 19.97 | 41.35 |
| 3P0G | 3.5 | β2AR | X-Ray Diffraction | No | BI-167107 | No | Active | 19.70 | 65.64 |
| 3SN6 | 3.2 | β2AR | X-Ray Diffraction | Gs | BI-167107 | No | Active | 19.60 | 72.44 |
| 4LDE | 2.8 | β2AR | X-Ray Diffraction | No | BI167107 | No | Active | 19.62 | 68.54 |
| 4LDL | 3.1 | β2AR | X-Ray Diffraction | No | CHEMBL1160696 | No | Active | 19.41 | 69.05 |
| 4LDO | 3.2 | β2AR | X-Ray Diffraction | No | epinephrine | No | Active | 19.50 | 69.63 |
| 4QKX | 3.3 | β2AR | X-Ray Diffraction | No | Q27453560 | No | Active | 19.33 | 69.30 |
| 6E67 | 3.7 | β2AR | X-Ray Diffraction | No | BI-167107 | No | Active | 19.24 | 71.90 |
| 6MXT | 3.0 | β2AR | X-Ray Diffraction | No | salmeterol | No | Active | 17.77 | 63.36 |
| 6N48 | 3.2 | β2AR | X-Ray Diffraction | No | BI167107 | No | Active | 19.29 | 68.95 |
| 6NI3 | 3.8 | β2V2R* | Electron Microscopy | Gs & β-arrstin | BI-167107 | No | Active | 19.59 | 73.38 |
| 2R4R | 3.4 | β2AR | X-Ray Diffraction | No | carazolol | No | Inactive | 20.61 | 41.24 |
| 2R4S | 3.4 | β2AR | X-Ray Diffraction | No | carazolol | No | Inactive | 20.58 | 41.31 |
| 2RH1 | 2.4 | β2AR | X-Ray Diffraction | No | carazolol | No | Inactive | 19.50 | 34.22 |
| 3D4S | 2.8 | β2AR | X-Ray Diffraction | No | timolol | cholesterol | Inactive | 19.38 | 32.97 |
| 3KJ6 | 3.4 | β2AR | X-Ray Diffraction | No | carazolol | No | Inactive | 20.38 | 42.04 |
| 3NY8 | 2.8 | β2AR | X-Ray Diffraction | No | ICI 118551 | No | Inactive | 19.28 | 33.53 |
| 3NY9 | 2.8 | β2AR | X-Ray Diffraction | No | ZINC4008295 | No | Inactive | 19.61 | 33.01 |
| 3NYA | 3.2 | β2AR | X-Ray Diffraction | No | alprenolol | No | Inactive | 19.74 | 33.55 |
| 3PDS | 3.5 | β2AR | X-Ray Diffraction | No | FAUC50 (covalent) | No | Inactive | 19.55 | 33.73 |
| 4GBR | 4.0 | β2AR | X-Ray Diffraction | No | alprenolol | No | Inactive | 19.39 | 42.58 |
| 5D5A | 2.5 | β2AR | X-Ray Diffraction | No | carazolol | No | Inactive | 19.41 | 33.68 |
| 5D5B | 3.8 | β2AR | X-Ray Diffraction | No | carazolol | No | Inactive | 19.37 | 34.03 |
| 5D6L | 3.2 | β2AR | X-Ray Diffraction | No | carazolol | No | Inactive | 19.49 | 33.96 |
| 5JQH | 3.2 | β2AR | X-Ray Diffraction | No | carazolol | No | Inactive | 19.30 | 41.08 |
| 5X7D | 2.7 | β2AR | X-Ray Diffraction | No | carazolol | Cmp-15PA | Inactive | 19.33 | 34.36 |
| 5X33 | 3.7 | BLT1 | X-Ray Diffraction | No | BIIL-260 | No | Inactive | 19.60 | 46.90 |
| 5O9H | 2.7 | C5aR | X-Ray Diffraction | No | NDT 9513727 | No | Inactive | 21.77 | 38.93 |
| 6C1Q | 2.9 | C5aR | X-Ray Diffraction | No | PMX53 | NDT9513727 | Inactive | 19.41 | 34.62 |
| 6C1R | 2.2 | C5aR | X-Ray Diffraction | No | PMX53 | Avacopan | Inactive | 21.48 | 39.21 |
| 5XR8 | 3.0 | CB1R | X-Ray Diffraction | No | 8D0 | No | Active | 19.66 | 62.13 |
| 5XRA | 2.8 | CB1R | X-Ray Diffraction | No | CHEMBL1683648 | No | Active | 19.72 | 61.80 |
| 6N4B | 3.0 | CB1R | Electron Microscopy | No | MDMB-fubinaca | ZCZ-011 | Active | 19.50 | 59.11 |
| 5TGZ | 2.8 | CB1R | X-Ray Diffraction | No | SCHEMBL662960 | No | Inactive | 21.03 | 43.59 |
| 5U09 | 2.6 | CB1R | X-Ray Diffraction | No | taranabant | No | Inactive | 23.31 | 40.92 |
| 5ZTY | 2.8 | CB1R | X-Ray Diffraction | No | AM10257 | No | Inactive | 21.90 | 37.94 |
| 6KQI | 3.2 | CB1R | X-Ray Diffraction | No | CP55940 | ORG27569 | Intermediate | 21.79 | 41.17 |
| 5T1A | 2.8 | CCR2 | X-Ray Diffraction | No | BMS681 | CCR2-RA-[R] | Inactive | 24.13 | 43.46 |
| 6GPS | 3.3 | CCR2 | X-Ray Diffraction | No | MK-0812 | No | Inactive | 21.17 | 48.70 |
| 6GPX | 2.7 | CCR2 | X-Ray Diffraction | No | MK-0812 | No | Inactive | 22.20 | 48.32 |
| 4MBS | 2.7 | CCR5 | X-Ray Diffraction | No | No | maraviroc | Inactive | 23.99 | 43.20 |
| 5UIW | 2.2 | CCR5 | X-Ray Diffraction | No | 5P7-CCL5 | No | Inactive | 19.04 | 44.33 |
| 6AKX | 2.8 | CCR5 | X-Ray Diffraction | No | CHEMBL4238063 | No | Inactive | 21.87 | 49.30 |
| 6AKY | 2.8 | CCR5 | X-Ray Diffraction | No | CHEMBL4249798 | No | Inactive | 21.70 | 48.61 |
| 6MEO | 3.9 | CCR5 | Electron Microscopy | No | envelope glycoprotein | No | Inactive | 24.27 | 44.07 |
| 6MET | 4.5 | CCR5 | Electron Microscopy | No | envelope glycoprotein | No | Inactive | 24.27 | 44.07 |
| 5LWE | 2.8 | CCR9 | X-Ray Diffraction | No | No | vercirnon | Inactive | 21.15 | 45.85 |
| 6D26 | 2.8 | CRTH2 | X-Ray Diffraction | No | fevipiprant | No | Inactive | 20.17 | 44.58 |
| 6D27 | 2.7 | CRTH2 | X-Ray Diffraction | No | CAY10471 | No | Inactive | 22.68 | 38.70 |
| 3ODU | 2.5 | CXCR4 | X-Ray Diffraction | No | IT1t | No | Inactive | 21.67 | 40.63 |
| 3OE0 | 2.9 | CXCR4 | X-Ray Diffraction | No | CVX15 | No | Inactive | 22.16 | 40.47 |
| 3OE6 | 3.2 | CXCR4 | X-Ray Diffraction | No | IT1t | No | Inactive | 21.51 | 40.66 |
| 3OE8 | 3.1 | CXCR4 | X-Ray Diffraction | No | IT1t | No | Inactive | 21.98 | 39.72 |
| 3OE9 | 3.1 | CXCR4 | X-Ray Diffraction | No | IT1t | No | Inactive | 21.64 | 40.33 |
| 4RWS | 3.1 | CXCR4 | X-Ray Diffraction | No | vMIP-II | No | Inactive | 22.05 | 41.21 |
| 4EJ4 | 3.4 | δ-OR | X-Ray Diffraction | No | naltrindole | No | Inactive | 21.80 | 40.63 |
| 4N6H | 1.8 | δ-OR | X-Ray Diffraction | No | naltrindole | No | Inactive | 21.43 | 40.59 |
| 4RWA | 3.3 | δ-OR | X-Ray Diffraction | No | DIPP-NH2 | No | Inactive | 22.17 | 39.65 |
| 4RWD | 2.7 | δ-OR | X-Ray Diffraction | No | DIPP-NH2 | No | Inactive | 21.98 | 40.23 |
| 6CM4 | 2.9 | D2R | X-Ray Diffraction | No | risperidone | No | Inactive | 20.23 | 38.44 |
| 3PBL | 2.9 | D3R | X-Ray Diffraction | No | eticlopride | No | Inactive | 20.28 | 33.47 |
| 5WIU | 2.0 | D4R | X-Ray Diffraction | No | nemonapride | No | Inactive | 20.23 | 37.00 |
| 5WIV | 2.1 | D4R | X-Ray Diffraction | No | nemonapride | No | Inactive | 20.33 | 37.21 |
| 6AK3 | 2.9 | EP3 | X-Ray Diffraction | No | prostaglandin E2 | No | Active | 20.07 | 56.79 |
| 6M9T | 2.5 | EP3 | X-Ray Diffraction | No | misoprostol-FA | No | Intermediate | 19.91 | 54.39 |
| 5YHL | 4.2 | EP4 | X-Ray Diffraction | No | ONO-AE3-208-Br | No | Inactive | 21.87 | 45.96 |
| 5YWY | 3.2 | EP4 | X-Ray Diffraction | No | ONO-AE3-208 | No | Inactive | 21.92 | 46.04 |
| 5GLH | 2.8 | ETBR | X-Ray Diffraction | No | Et 1 | No | Inactive | 19.70 | 40.59 |
| 5GLI | 2.5 | ETBR | X-Ray Diffraction | No | No | No | Inactive | 20.77 | 44.87 |
| 5X93 | 2.2 | ETBR | X-Ray Diffraction | No | K-8794 | No | Inactive | 20.64 | 45.04 |
| 5XPR | 3.6 | ETBR | X-Ray Diffraction | No | bosentan | No | Inactive | 20.29 | 44.12 |
| 6IGL | 2.7 | ETBR | X-Ray Diffraction | No | IRL1620 | No | Inactive | 20.78 | 47.73 |
| 6K1Q | 2.7 | ETBR | X-Ray Diffraction | No | IRL2500 | No | Inactive | 20.60 | 39.90 |
| 6IGK | 2.0 | ETBR | X-Ray Diffraction | No | endothelin-3 | No | Intermediate | 19.43 | 51.80 |
| 4PHU | 2.3 | GPR40 | X-Ray Diffraction | No | TAK-875 | No | Intermediate | 20.65 | 52.57 |
| 5KW2 | 2.8 | GPR40 | X-Ray Diffraction | No | No | 6XQ | Intermediate | 17.75 | 53.22 |
| 5TZR | 2.2 | GPR40 | X-Ray Diffraction | No | MK-8666 | No | Intermediate | 17.86 | 52.75 |
| 5TZY | 3.2 | GPR40 | X-Ray Diffraction | No | MK-8666 | AP8 | Intermediate | 17.63 | 53.25 |
| 3RZE | 3.1 | H1R | X-Ray Diffraction | No | doxepin | No | Inactive | 20.36 | 36.07 |
| 6B73 | 3.1 | κ-OR | X-Ray Diffraction | No | MP1104 | No | Active | 18.63 | 65.24 |
| 4DJH | 2.9 | κ-OR | X-Ray Diffraction | No | JDTic | No | Inactive | 21.21 | 39.39 |
| 4Z34 | 3.0 | LPA1 | X-Ray Diffraction | No | ONO-9780307 | No | Inactive | 18.25 | 37.62 |
| 4Z35 | 2.9 | LPA1 | X-Ray Diffraction | No | ONO-9910539 | No | Inactive | 18.28 | 37.57 |
| 4Z36 | 2.9 | LPA1 | X-Ray Diffraction | No | ONO-3080573 | No | Inactive | 18.30 | 37.62 |
| 5XSZ | 3.2 | LPA6 | X-Ray Diffraction | No | No | No | Active | 21.32 | 63.97 |
| 5C1M | 2.1 | μ-OR | X-Ray Diffraction | No | BU72 | No | Active | 19.14 | 66.35 |
| 6DDE | 3.5 | μ-OR | X-Ray Diffraction | Gi | DAMGO | No | Active | 18.86 | 63.67 |
| 6DDF | 3.5 | μ-OR | X-Ray Diffraction | Gi | DAMGO | No | Active | 18.72 | 63.67 |
| 4DKL | 2.8 | μ-OR | X-Ray Diffraction | No | BF0 | No | Inactive | 22.55 | 40.92 |
| 6OIJ | 3.3 | M1R | Electron Microscopy | G11 | iperoxo | VU0357017 | Active | 19.02 | 68.72 |
| 5CXV | 2.7 | M1R | X-Ray Diffraction | No | CHEMBL258622 | No | Inactive | 17.39 | 50.15 |
| 4MQS | 3.5 | M2R | X-Ray Diffraction | No | iperoxo | No | Active | 18.79 | 67.65 |
| 4MQT | 3.7 | M2R | X-Ray Diffraction | No | iperoxo | LY2119620 | Active | 19.08 | 67.04 |
| 6OIK | 3.6 | M2R | Electron Microscopy | GoA | iperoxo | LY2119620 | Active | 17.74 | 66.56 |
| 3UON | 3.0 | M2R | X-Ray Diffraction | No | R-(−)-3-QNB | No | Inactive | 21.27 | 40.00 |
| 5YC8 | 2.5 | M2R | X-Ray Diffraction | No | N-methyl scopolamine | No | Inactive | 19.98 | 44.00 |
| 5ZK3 | 2.6 | M2R | X-Ray Diffraction | No | (R)-(-)-QNB | No | Inactive | 20.04 | 44.59 |
| 5ZK8 | 3.0 | M2R | X-Ray Diffraction | No | N-methyl scopolamine | No | Inactive | 19.81 | 44.71 |
| 5ZKB | 3.0 | M2R | X-Ray Diffraction | No | AF-DX 384 | No | Inactive | 20.33 | 44.81 |
| 5ZKC | 2.3 | M2R | X-Ray Diffraction | No | N-methyl scopolamine | No | Inactive | 19.99 | 44.22 |
| 4DAJ | 3.4 | M3R | X-Ray Diffraction | No | tiotropium | No | Inactive | 19.24 | 33.96 |
| 4U14 | 3.6 | M3R | X-Ray Diffraction | No | tiotropium | No | Inactive | 19.33 | 42.62 |
| 4U15 | 2.8 | M3R | X-Ray Diffraction | No | tiotropium | No | Inactive | 19.88 | 49.44 |
| 4U16 | 3.7 | M3R | X-Ray Diffraction | No | methscopolamine | No | Inactive | 19.89 | 48.88 |
| 5ZHP | 3.1 | M3R | X-Ray Diffraction | No | SCHEMBL21052216 | No | Inactive | 17.40 | 47.47 |
| 5DSG | 2.6 | M4R | X-Ray Diffraction | No | tiotropium | No | Inactive | 19.55 | 41.96 |
| 6ME2 | 2.8 | MT1 | X-Ray Diffraction | No | ramelteon | No | Inactive | 21.44 | 41.21 |
| 6ME3 | 2.9 | MT1 | X-Ray Diffraction | No | 2-phenylmelatonin | No | Inactive | 21.38 | 41.57 |
| 6ME4 | 3.2 | MT1 | X-Ray Diffraction | No | 2-Iodomelatonin | No | Inactive | 21.12 | 40.81 |
| 6ME5 | 3.2 | MT1 | X-Ray Diffraction | No | agomelatine | No | Inactive | 21.01 | 40.84 |
| 6ME6 | 2.8 | MT2 | X-Ray Diffraction | No | 2-phenylmelatonin | No | Inactive | 21.31 | 39.72 |
| 6ME7 | 3.2 | MT2 | X-Ray Diffraction | No | 2-phenylmelatonin | No | Inactive | 21.27 | 39.93 |
| 6ME8 | 3.1 | MT2 | X-Ray Diffraction | No | 2-phenylmelatonin | No | Inactive | 21.34 | 39.11 |
| 6ME9 | 3.3 | MT2 | X-Ray Diffraction | No | ramelteon | No | Inactive | 21.38 | 37.98 |
| 6E59 | 3.4 | NK1R | X-Ray Diffraction | No | L760735 | No | Inactive | 20.05 | 40.55 |
| 6HLL | 3.3 | NK1R | X-Ray Diffraction | No | CP-99,994 | No | Inactive | 18.65 | 43.65 |
| 6HLO | 2.4 | NK1R | X-Ray Diffraction | No | aprepitant | No | Inactive | 18.40 | 43.78 |
| 6HLP | 2.2 | NK1R | X-Ray Diffraction | No | netupitant | No | Inactive | 18.38 | 43.82 |
| 6J20 | 2.7 | NK1R | X-Ray Diffraction | No | aprepitant | No | Inactive | 20.56 | 41.66 |
| 6J21 | 3.2 | NK1R | X-Ray Diffraction | No | aprepitant | No | Inactive | 20.46 | 41.38 |
| 4EA3 | 3.0 | NOP | X-Ray Diffraction | No | CHEMBL201945 | No | Inactive | 21.97 | 40.10 |
| 5DHG | 3.0 | NOP | X-Ray Diffraction | No | NOP-C35 | No | Inactive | 21.97 | 40.26 |
| 5DHH | 3.0 | NOP | X-Ray Diffraction | No | SB-612111 | No | Inactive | 22.03 | 40.40 |
| 4GRV | 2.8 | NTSR1 | X-Ray Diffraction | No | neurotensin(8-13) | No | Active | 18.64 | 66.42 |
| 5T04 | 3.3 | NTSR1 | X-Ray Diffraction | No | CHEMBL342252 | No | Active | 19.47 | 63.27 |
| 6PWC | 4.9 | NTSR1 | Electron Microscopy | β-arrstin-2 | neurotensin peptide | No | Active | 16.29 | 66.71 |
| 3ZEV | 3.0 | NTSR1 | X-Ray Diffraction | No | neurotensin peptide | No | Inactive | 17.56 | 57.14 |
| 4BUO | 2.8 | NTSR1 | X-Ray Diffraction | No | neurotensin peptide | No | Inactive | 19.50 | 47.96 |
| 4BV0 | 3.1 | NTSR1 | X-Ray Diffraction | No | neurotensin peptide | No | Inactive | 19.16 | 45.58 |
| 4BWB | 3.6 | NTSR1 | X-Ray Diffraction | No | neurotensin peptide | No | Inactive | 19.03 | 46.95 |
| 4XEE | 2.9 | NTSR1 | X-Ray Diffraction | No | neurotensin peptide | No | Intermediate | 18.54 | 52.26 |
| 4XES | 2.6 | NTSR1 | X-Ray Diffraction | No | neurotensin peptide | No | Intermediate | 18.70 | 45.05 |
| 6OS9 | 3.0 | NTSR1 | Electron Microscopy | Gi1 | JMV449 | No | Intermediate | 19.02 | 52.31 |
| 6OSA | 3.0 | NTSR1 | Electron Microscopy | Gi1 | JMV449 | No | Intermediate | 19.37 | 48.04 |
| 4ZJ8 | 2.8 | OX1R | X-Ray Diffraction | No | suvorexant | No | Inactive | 20.78 | 43.77 |
| 4ZJC | 2.8 | OX1R | X-Ray Diffraction | No | SB-674042 | No | Inactive | 20.76 | 43.87 |
| 4S0V | 2.5 | OX2R | X-Ray Diffraction | No | suvorexant | No | Inactive | 20.49 | 41.15 |
| 5WQC | 2.0 | OX2R | X-Ray Diffraction | No | EMPA | No | Inactive | 20.73 | 41.41 |
| 5WS3 | 2.3 | OX2R | X-Ray Diffraction | No | EMPA | No | Inactive | 20.70 | 41.76 |
| 4XNV | 2.2 | P2Y1R | X-Ray Diffraction | No | BPTU | No | Intermediate | 21.60 | 50.47 |
| 4XNW | 2.7 | P2Y1R | X-Ray Diffraction | No | MRS2500 | No | Intermediate | 21.59 | 50.20 |
| 4NTJ | 2.6 | P2Y12R | X-Ray Diffraction | No | AZD1283 | No | Intermediate | 21.72 | 66.07 |
| 4PXZ | 2.5 | P2Y12R | X-Ray Diffraction | No | 2-MeSADP | No | Intermediate | 20.93 | 55.20 |
| 4PY0 | 3.1 | P2Y12R | X-Ray Diffraction | No | 2-Mesatp | No | Intermediate | 21.14 | 55.61 |
| 5ZKP | 2.8 | PAFR | X-Ray Diffraction | No | foropafant | No | Active | 17.92 | 68.87 |
| 5ZKQ | 2.9 | PAFR | X-Ray Diffraction | No | ABT-491 | No | Intermediate | 17.54 | 55.73 |
| 3VW7 | 2.2 | PAR1 | X-Ray Diffraction | No | vorapaxar | No | Intermediate | 20.32 | 56.46 |
| 5NDD | 2.8 | PAR2 | X-Ray Diffraction | No | No | AZ8838 | Intermediate | 19.60 | 61.96 |
| 5NDZ | 3.6 | PAR2 | X-Ray Diffraction | No | No | AZ3451 | Intermediate | 19.73 | 60.86 |
| 5NJ6 | 4.0 | PAR2 | X-Ray Diffraction | No | No | AZ7188 | Intermediate | 19.68 | 62.46 |
| 2X72 | 3.0 | rhodopsin | X-Ray Diffraction | GαCT peptide | all-*trans*-retinal | No | Active | 21.62 | 65.97 |
| 3CAP | 2.9 | rhodopsin | X-Ray Diffraction | No | No | No | Active | 21.22 | 64.81 |
| 3DQB | 3.2 | rhodopsin | X-Ray Diffraction | GαCT peptide | No | No | Active | 20.98 | 66.91 |
| 3PQR | 2.9 | rhodopsin | X-Ray Diffraction | GαCT2 peptide | all-*trans*-retinal | No | Active | 21.81 | 67.30 |
| 3PXO | 3.0 | rhodopsin | X-Ray Diffraction | No | all-*trans*-retinal | No | Active | 21.93 | 66.48 |
| 4A4M | 3.3 | rhodopsin | X-Ray Diffraction | GαCT peptide | No | No | Active | 21.43 | 66.29 |
| 4BEY | 2.9 | rhodopsin | X-Ray Diffraction | GαCT2 peptide | No | No | Active | 21.23 | 65.67 |
| 4BEZ | 3.3 | rhodopsin | X-Ray Diffraction | No | No | No | Active | 21.19 | 65.89 |
| 4J4Q | 2.7 | rhodopsin | X-Ray Diffraction | GαCT peptide | β-D-glucopyranoside | No | Active | 21.48 | 66.38 |
| 4PXF | 2.8 | rhodopsin | X-Ray Diffraction | ArrFL-1 | No | No | Active | 21.56 | 65.90 |
| 4X1H | 2.3 | rhodopsin | X-Ray Diffraction | GαCT peptide | nonyl-glucoside | No | Active | 21.44 | 66.58 |
| 4ZWJ | 3.3 | rhodopsin | X-Ray Diffraction | visual arrestin | No | No | Active | 21.67 | 67.20 |
| 5DGY | 7.7 | rhodopsin | X-Ray Diffraction | visual arrestin | No | No | Active | 21.67 | 67.21 |
| 5DYS | 2.3 | rhodopsin | X-Ray Diffraction | No | all-*trans*-retinal | No | Active | 21.88 | 66.05 |
| 5EN0 | 2.8 | rhodopsin | X-Ray Diffraction | GαCT2 peptide | all-*trans*-retinal | No | Active | 21.65 | 66.76 |
| 5TE3 | 2.7 | rhodopsin | X-Ray Diffraction | No | No | No | Active | 21.48 | 65.40 |
| 5W0P | 3.0 | rhodopsin | X-Ray Diffraction | visual arrestin | No | No | Active | 17.90 | 68.30 |
| 5WKT | 3.2 | rhodopsin | X-Ray Diffraction | GαCT2 peptide | No | No | Active | 21.41 | 67.15 |
| 6CMO | 4.5 | rhodopsin | Electron Microscopy | Gi | No | No | Active | 19.67 | 69.61 |
| 6FK6 | 2.4 | rhodopsin | X-Ray Diffraction | No | RS01 | No | Active | 21.23 | 62.88 |
| 6FK7 | 2.6 | rhodopsin | X-Ray Diffraction | No | RS06 | No | Active | 21.19 | 62.89 |
| 6FK8 | 2.9 | rhodopsin | X-Ray Diffraction | No | RS08 | No | Active | 21.20 | 63.45 |
| 6FK9 | 2.6 | rhodopsin | X-Ray Diffraction | No | RS09 | No | Active | 21.25 | 63.33 |
| 6FKA | 2.7 | rhodopsin | X-Ray Diffraction | No | RS11 | No | Active | 21.21 | 62.98 |
| 6FKB | 3.0 | rhodopsin | X-Ray Diffraction | No | RS13 | No | Active | 21.32 | 63.68 |
| 6FKC | 2.5 | rhodopsin | X-Ray Diffraction | No | RS15 | No | Active | 21.27 | 63.09 |
| 6FKD | 2.5 | rhodopsin | X-Ray Diffraction | No | RS16 | No | Active | 21.27 | 63.15 |
| 6FUF | 3.1 | rhodopsin | X-Ray Diffraction | mini-Go | No | No | Active | 21.41 | 66.58 |
| 6OY9 | 3.9 | rhodopsin | Electron Microscopy | Gt1 | retinal | No | Active | 19.79 | 68.72 |
| 6OYA | 3.3 | rhodopsin | Electron Microscopy | Gt1 | retinal | No | Active | 21.56 | 66.01 |
| 6QNO | 4.4 | rhodopsin | Electron Microscopy | Gi | 9-*cis*-retinal | No | Active | 20.88 | 69.80 |
| 1F88 | 2.8 | rhodopsin | X-Ray Diffraction | No | 11-*cis*-retinal | No | Inactive | 23.11 | 41.59 |
| 1GZM | 2.7 | rhodopsin | X-Ray Diffraction | No | 11-*cis*-retinal | No | Inactive | 23.55 | 42.28 |
| 1HZX | 2.8 | rhodopsin | X-Ray Diffraction | No | 11-*cis*-retinal | No | Inactive | 22.63 | 42.47 |
| 1L9H | 2.6 | rhodopsin | X-Ray Diffraction | No | 11-*cis*-retinal | No | Inactive | 22.76 | 40.87 |
| 1U19 | 2.2 | rhodopsin | X-Ray Diffraction | No | 11-*cis*-retinal | No | Inactive | 22.67 | 42.57 |
| 2G87 | 2.6 | rhodopsin (bathorhodopsin) | X-Ray Diffraction | No | retinal | No | Inactive | 22.63 | 42.32 |
| 2HPY | 2.8 | rhodopsin (lumirhodopsin) | X-Ray Diffraction | No | retinal | No | Inactive | 22.51 | 43.61 |
| 2I35 | 3.8 | rhodopsin | X-Ray Diffraction | No | 11-*cis*-retinal | No | Inactive | 23.27 | 40.74 |
| 2I36 | 4.1 | rhodopsin | X-Ray Diffraction | No | No | No | Inactive | 23.28 | 38.90 |
| 2I37 | 4.2 | rhodopsin | X-Ray Diffraction | No | No | No | Inactive | 23.58 | 40.52 |
| 2J4Y | 3.4 | rhodopsin | X-Ray Diffraction | No | 11-*cis*-retinal | No | Inactive | 22.62 | 43.30 |
| 2PED | 3.0 | rhodopsin | X-Ray Diffraction | No | 9-*cis*-retinal | No | Inactive | 22.71 | 42.26 |
| 2Z73 | 2.5 | rhodopsin | X-Ray Diffraction | No | 11-*cis*-retinal | No | Inactive | 21.07 | 39.95 |
| 2ZIY | 3.7 | rhodopsin | X-Ray Diffraction | No | 11-*cis*-retinal | No | Inactive | 20.62 | 39.28 |
| 3AYM | 2.8 | rhodopsin | X-Ray Diffraction | No | all-*trans*-retinal | No | Inactive | 21.07 | 40.01 |
| 3AYN | 2.7 | rhodopsin | X-Ray Diffraction | No | 9-*cis*-retinal | No | Inactive | 21.09 | 39.91 |
| 3C9L | 2.6 | rhodopsin | X-Ray Diffraction | No | 11-*cis*-retinal | No | Inactive | 23.59 | 42.36 |
| 3C9M | 3.4 | rhodopsin | X-Ray Diffraction | No | 11-*cis*-retinal | No | Inactive | 22.82 | 43.90 |
| 3OAX | 2.6 | rhodopsin | X-Ray Diffraction | No | 11-*cis*-retinal | β-ionone | Inactive | 22.99 | 42.22 |
| 4WW3 | 2.8 | rhodopsin | X-Ray Diffraction | No | retinal | No | Inactive | 21.10 | 40.13 |
| 5TE5 | 4.0 | rhodopsin | X-Ray Diffraction | No | 6mr | No | Inactive | 23.31 | 40.92 |
| 6I9K | 2.1 | rhodopsin | X-Ray Diffraction | No | 9-*cis*-retinal | No | Inactive | 21.79 | 41.17 |
| 3V2W | 3.4 | S1P1 | X-Ray Diffraction | No | ML056 | No | Inactive | 23.00 | 41.30 |
| 3V2Y | 2.8 | S1P1 | X-Ray Diffraction | No | ML056 | No | Inactive | 20.18 | 38.61 |
| 6IIU | 2.5 | TP | X-Ray Diffraction | No | ramatroban | No | Inactive | 18.99 | 39.52 |
| 6IIV | 3.0 | TP | X-Ray Diffraction | No | daltroban | No | Inactive | 18.83 | 39.61 |
| 4XT1 | 2.9 | US28 | X-Ray Diffraction | No | CX3CL1 | No | Active | 18.47 | 57.65 |
| 4XT3 | 3.8 | US28 | X-Ray Diffraction | No | fractalkine | No | Active | 18.50 | 58.79 |
| 5WB1 | 3.5 | US28 | X-Ray Diffraction | No | No | No | Active | 18.96 | 58.73 |
| 5WB2 | 3.5 | US28 | X-Ray Diffraction | No | CX3CL1 | No | Active | 18.67 | 58.90 |
| 5ZBH | 3.0 | Y1R | X-Ray Diffraction | No | BMS-193885 | No | Inactive | 20.72 | 50.32 |
| 5ZBQ | 2.7 | Y1R | X-Ray Diffraction | No | UR-MK299 | No | Inactive | 20.56 | 41.92 |
| * Fusioned protein of β2AR and V2R | | | |  |  |  |  |  |  |

**Section 3: Validation of Markov State Model Based on the Activation Parameters**

Before the construction of our MSM, we confirmed the Markovian lag time of our system via the implied timescale test. According to specified k-means cluster parameters, multiple transition probability matrixes (TPMs) were constructed corresponding to distinct lag times which represents the time interval between transitions. TPMs reflect the possibility of transition among all microstates and determine the relaxation timescales (i.e. implied timescale) through Eq. (S1).

| τi = - τ/ln λi | (S1) |
| --- | --- |

where τ represents the lag time for the computation of TPMs, λi is the ith eigenvalue of the TPM and τi means the implied timescale corresponding to the ith relaxation of the model.

For a special system, the results of eigendecomposition reflect the timescale of transition and λ1 represents the slowest transition. As a function of the lag time τ, τi (especially τ0) will be constant when the transition dynamics between microstates are Markovian2,3. During the test, we clustered the points into 200 microstates using k-means algorithm and a maximum iteration number of 200. As shown in Fig. S3A, our τi curves start to be flattened from a lag time of 5 ns, suggesting that a lag time longer of 5 ns confirms the Markovian properties of our activation parameters. To guarantee the accuracy of our analysis, we set 8 ns as the lag time of our system.

According to the shape of AT1R activation pathway, we further clustered the microstates into three macrostates using the Perron Cluster Cluster Analysis (PCCA+) algorithm. Through the Chapman-Kolmogorov test shown in Fig. S3B, the transition probability estimated by MSM is highly close to practical transition process4. Thus, our MSM estimation is validated in both microstates and macrostates.


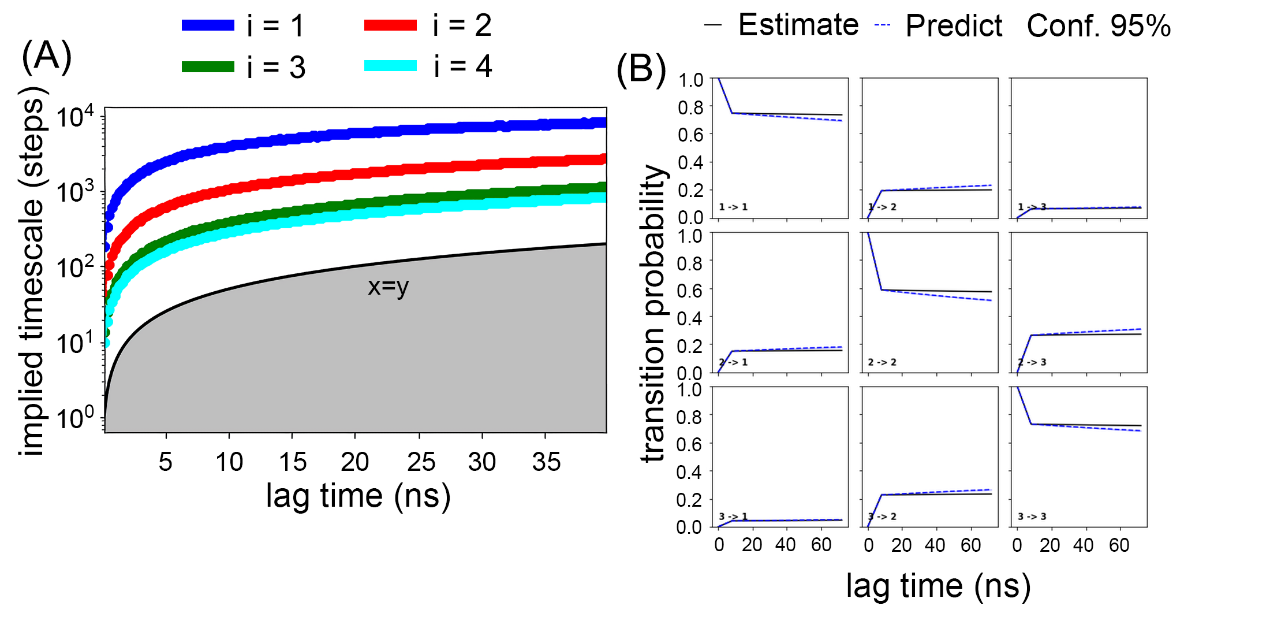


**Fig. S3** The validation of MSM accomplished by PyEMMA5. (A) The implied timescale test in which the timescale τi was shown as a function of lag time. (B) The result of the Chapman-Kolmogorov test. Estimate line (solid) are probability calculated by MSM, while predict lines (dotted) are probability observed in trajectories.

**Section 4: Secondary Structure of Different Macrostates**

Using mdtraj package, we extracted structures corresponding to each macrostate into trajectories (see Methods). These trajectories conclude snapshots far more than single representative structures and provide more general information for different AT1R states during simulations. Thus, we applied the DSSP algorithm to reflect the flexibility of the whole structure. The output secondary structure classification of each residue in its snapshot course is shown in Fig. S4.


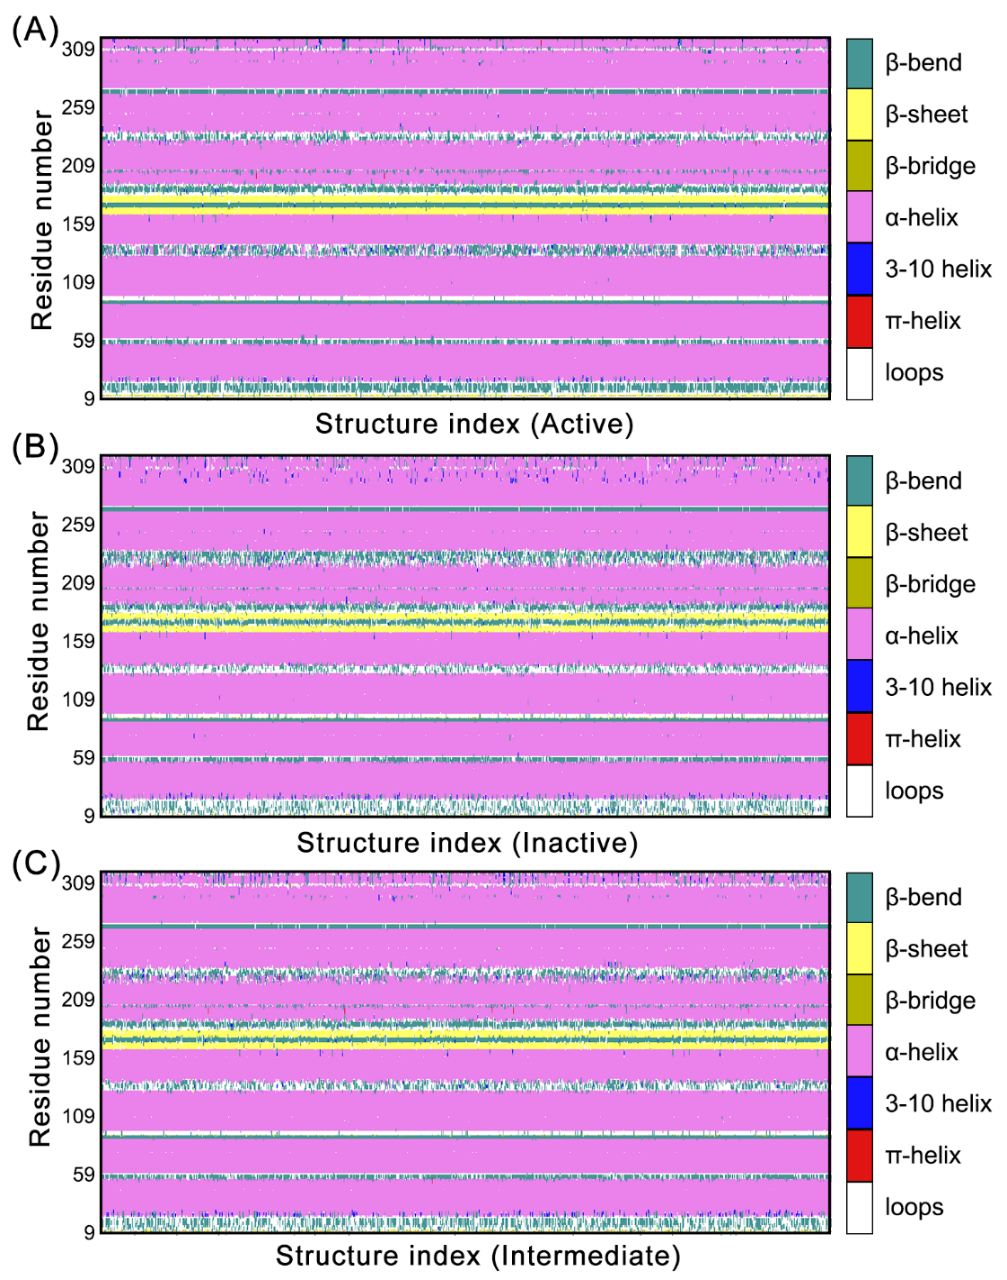


**Fig. S4** The secondary structure of representative structures around the center of every microstate in active (A), inactive (B), and intermediate (C) states, based on DSSP classification. Structure category corresponding to its colors is shown on the right.

**Section 5: Community Dynamics and Signal Transmission of Each State**

Community analysis was also conducted to elucidate the signal transmission in different AT1R. During the community analysis, the community networks of distinct AT1R were determined as sets of nodes connected by weighted edges. Cα atom for each residue was defined as a node, while nodes are connected if the minimum distance between the residues were lower than 4.5 Å for at least 75% of the representative trajectories. Floyd–War-shall algorithm calculated the optimal paths among all pairs of nodes6. Then, we counted the pairwise optimal paths between nodes and set it as the betweenness. A community was formed if and only if a group of nodes are more intra-connected with each other than inter-connected with other nodes. With the help of the Girvan–Newman algorithm, communities were further optimized to maximize the modularity measure7. Of note, communities with too few (fewer than three) residues or only with connection to one other community were merged to the nearby communities. The final community distributions for AT1Rs are shown in Fig. S5.


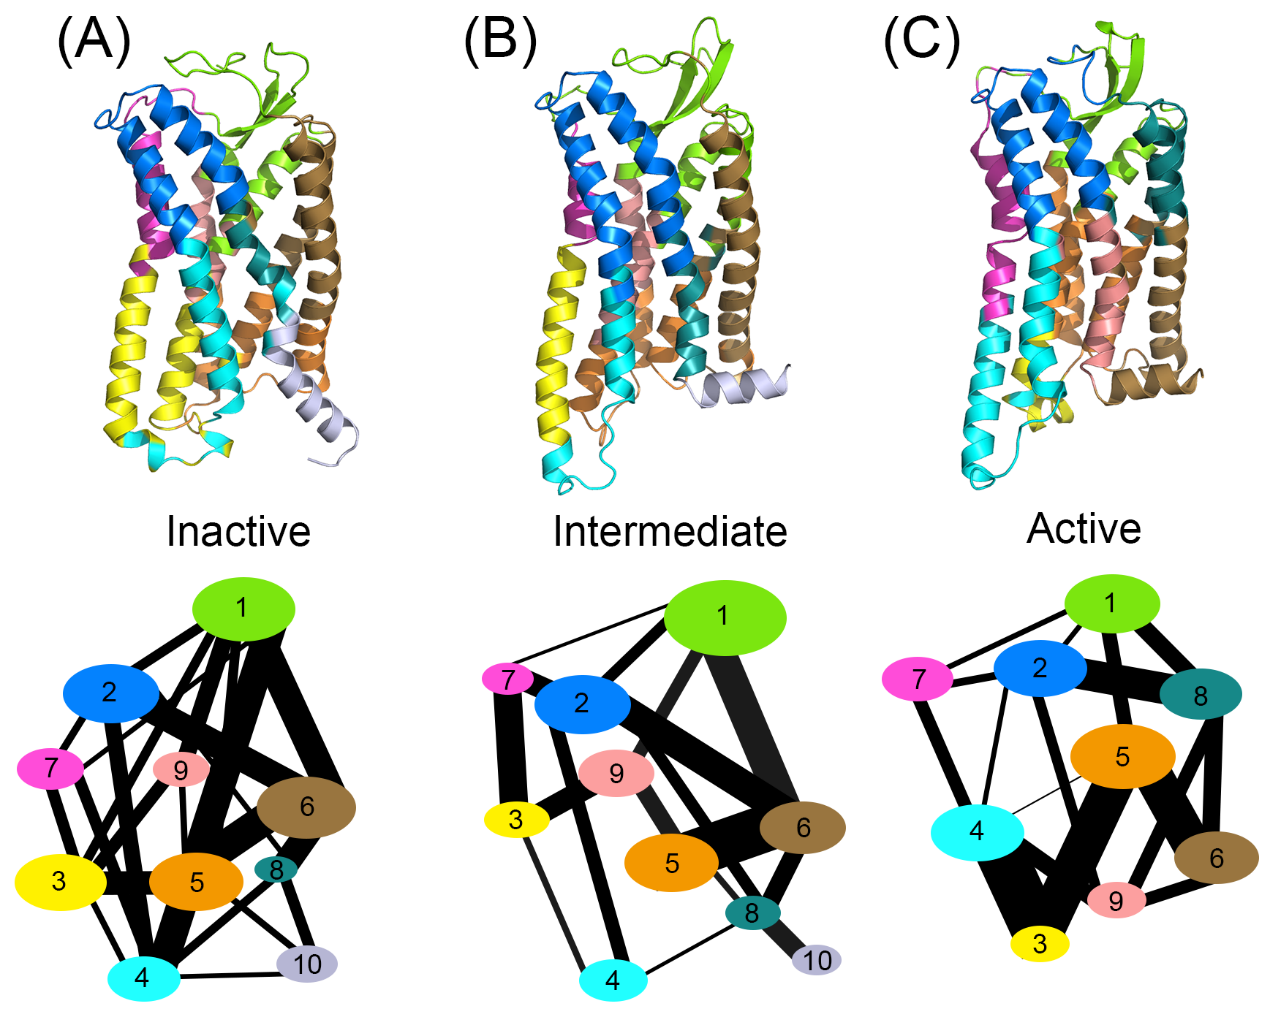


**Fig. S5** The community network of inactive (A), intermediate (B), and active (C) macrostates. Ovals represent corresponding communities with the following color scheme (C1: green, C2: blue, C3: yellow, C4: cyan, C5: orange, C6: sand, C7: magenta, C8: dark green, C9: salmon, C10: light blue, consistent with cartoon color shown on the top). The areas of ovals represent the number of residues in the community and the width of lines connecting each community is proportional to the betweenness of the communities.

**Section 6: TICA Analysis of Trajectories**

To build an MSM based on tICA, we firstly aligned structures on the first one to elucidate the influence of translation and rotation, then we featurized the Cartesian coordinates in trajectories to decrease the dimension. After the alignment finished by CPPTRAJ, the “add_backbone_torsions” function provided by PyEMMA was used to extract all backbone phi/psi angles during simulation, reflecting the global movement of the membrane-embedded AT1R5,8. Next, considering the great ability of tICA to describe slow dynamics in simulation, the “coordinates_tica” method was applied for dimensionality reduction to 2-dimension9. Referred to the implied timescale test for activation parameter, Eq. (S1) was applied for the Markovian property test of tICA landscape with 200 cluster centers and 200 maximum k-means iterations. As shown in Fig. S6A, the τi curves of AT1R become independent of lag time from 5 ns. Consequently, a lag time longer of 5 ns confirms tICA landscape Markovian and we also set 8 ns as the lag time for the creation of MSM using the “msm.estimate_markov_model” function.

After plotting the Markovian tIC1 and tIC2 on Fig. S7A to show the global movement ensemble, we also employed the PCCA+ algorithm to the systems and clustered it into eight macrostates. The distribution of them is shown in Fig. S7B. Similarly, the Chapman-Kolmogorov test (Fig. S6B) proved that the 8-macrostate model matches the practical transformation happened in simulation. Next, representative trajectories for macrostates were extracted by mdtraj using snapshots close to k-means centers. According to Sij calculated by Eq. (5), the structure with the most Sij on each trajectory was identified as the representative structure, which was projected onto Fig. 5A according to its activation parameter. With the help of the MFPT algorithm, the transition time among macrostates was determined by the “msm.estimate_markov_model.mfpt” method.


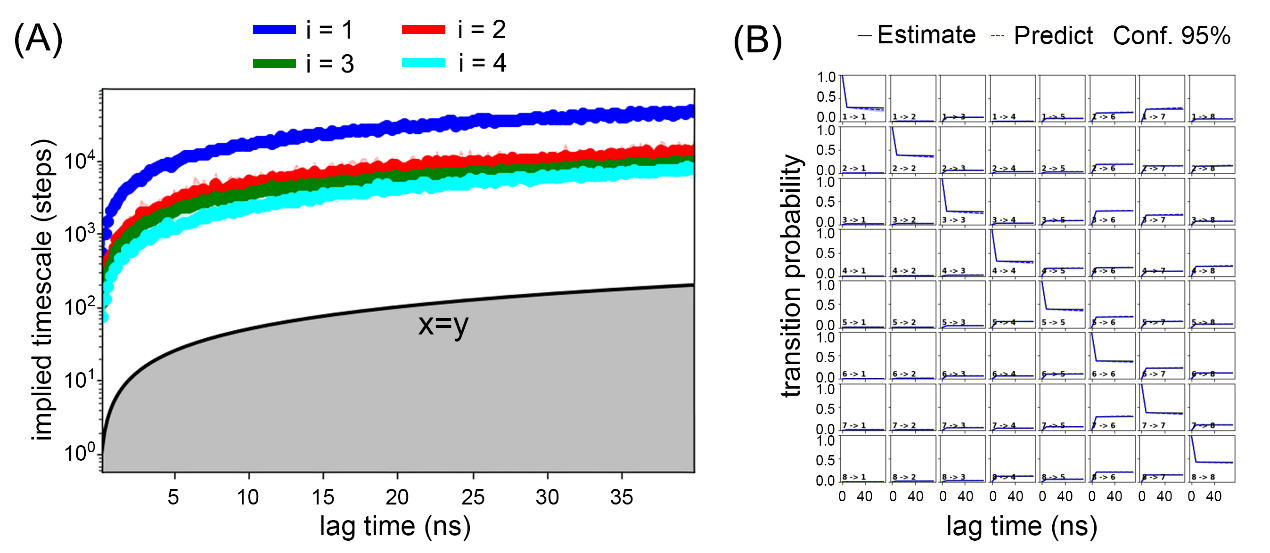


**Fig. S6** The validation of an MSM constructed by tICA. (A) The result of the implied timescale test. Different timescales τ1, τ2, τ3, and τ4 were represented as a blue, red, green, and cyan lines changing with lag time. (B) The result of the 8-state Chapman-Kolmogorov test. MSM estimates the solid probability lines, while dotted predict lines are transition probability observed in simulations.


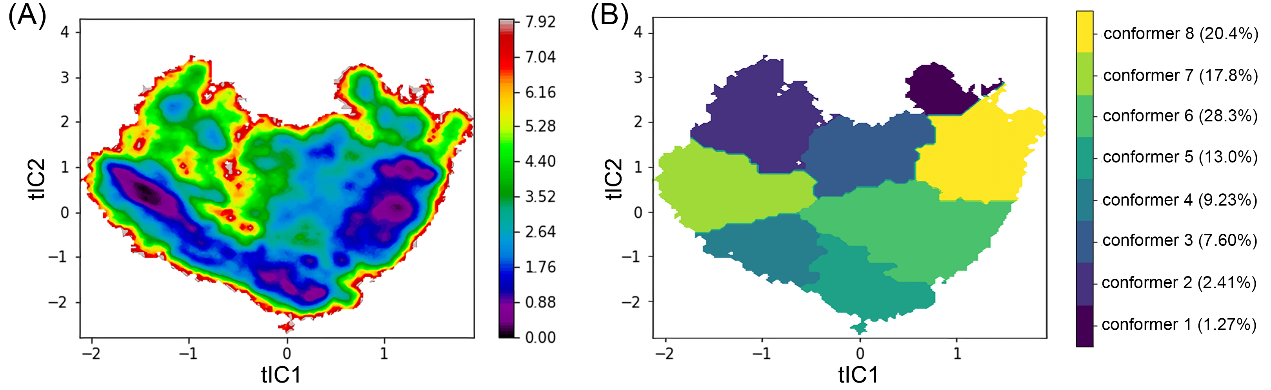


**Fig. S7** (A) 2-D free energy landscape of AT1R simulation based on the first and second tICA components (tIC1 and tIC2). The unit of free energy is kcal/mol. (B) The distribution of eight macrostates on the tICA landscape. Corresponding color and proportion are shown on the right.

**Section 7: The Construction of AT1R-transducer System**

The AT1R-transducer models in Fig. 6 were accomplished by aligning the representative active structure of the tICA landscape to all receptor Cα atoms in Gq-bound and β-arrestin-bound GPCR structures using PyMOL. To highlight the significant area, we only modeled the α5 helix of Gq and the finger loop of β-arrestin 1 because they are the only regions inserting into the intracellular side of GPCRs. Considering a recent publication10, the structure of M1 muscarinic acetylcholine receptor (M1AChR) bound to G11 (PDB ID: 6OIJ) was used to construct Gq-bound AT1R models, because the α5 helix is identical in G11 and Gq11. Similarly, the β-arrestin-bound AT1R model was constructed based on the rhodopsin-arrestin-1 structure (PDB ID: 4ZWJ)12. On the finger loop, the distinction between β-arrestins is only fewer than two residues. Considering the high similarity of arrestin-1 and other β-arrestins, the β-arrestin-1-bound AT1R model has been enough to represent all β-arrestin-bound AT1R models.

**Section 8: Pocket Location in Three Macrostates**

Using Fpocket, we identified the potential pockets of inactive, active, and intermediate macrostates13. To determine the pockets only belonging to intermediate state, we compared the result of prediction among the three states. Table S2 depicts the detailed position of each pocket in the intermediate state. In Fig. S8, the location of every overlapping pocket in the intermediate state is shown. According to the condition shown in the Fig. S8 and Table S2, P6 and P9 are defined as the pockets only existing in the intermediate state.

**Table S2.** Summary of pocket sites in the intermediate state

| *Pocket name* | *Pocket Position* | *Pocket overlap with other AT1Rs* | *Pocket overlap with other class A GPCRs with allosteric modulators* |
| --- | --- | --- | --- |
| P1 | Inside the whole AT1R | Active and inactive | All class A GPCRs |
| P2 | Between TM7 and N-terminal, extracellular | Active | M2R |
| P3 | Between the middle of TM5 and TM6, membrane side | Active | None |
| P4 | Between the top of TM1 and TM2, membrane side | Active | P2Y1R |
| P5 | Between the bottom of TM5 and TM6, membrane side | Active and inactive | None |
| P6 | Between TM7, H8 and TM1 | None | None |
| P7 | Between TM3, TM5, and TM6, intracellular | Active | None |
| P8 | Between ICL2, TM2, TM3, and TM4, intracellular | Active and inactive | AP8 |
| P9 | Between TM1, TM2, and TM7, intracellular | None | CCR2, CCR9, and β2AR |


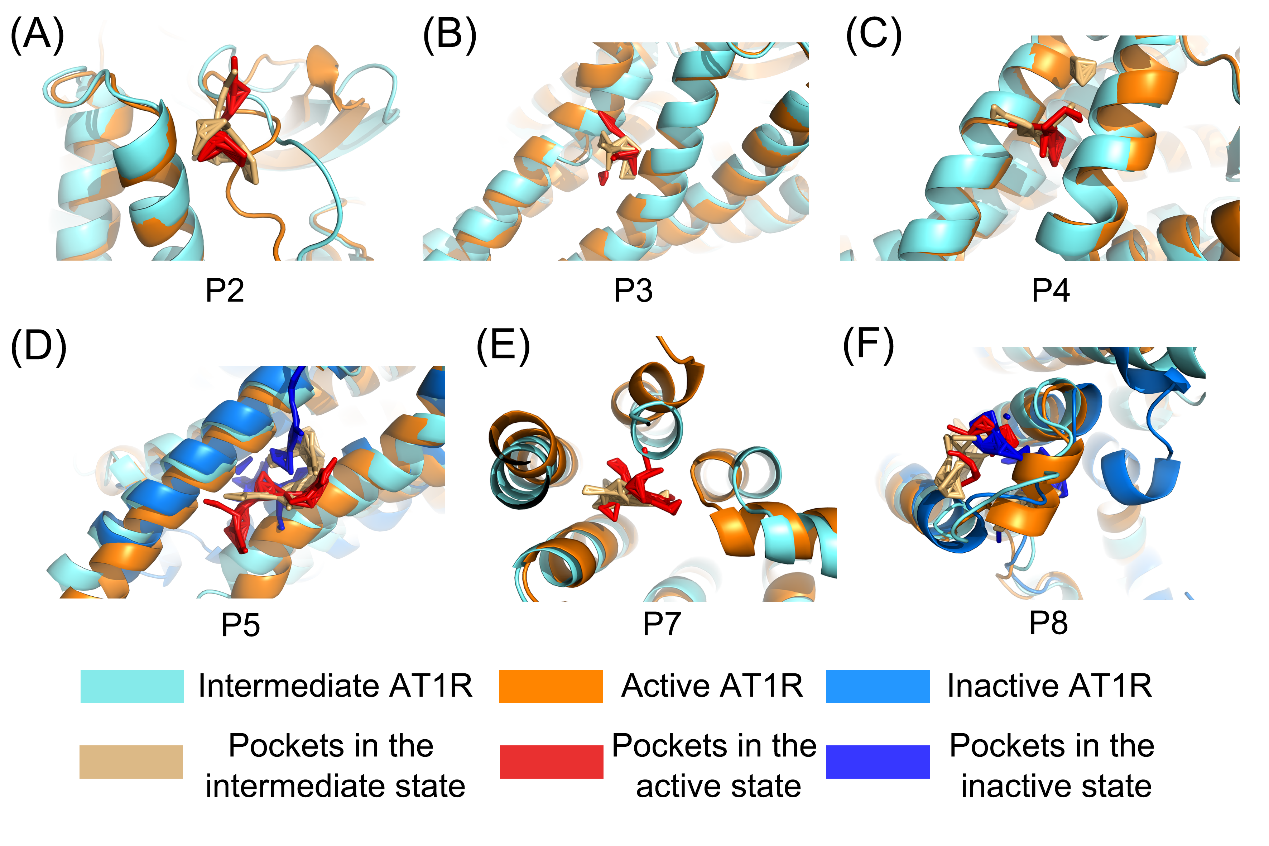


**Fig. S8** The overlapping pockets predicted by Fpocket in the active, inactive, and intermediate states. (A), (B), (C), (D), (E), (F) show P2, P3, P4, P5, P7, P8 pockets, respectively. Cyan, orange, and blue cartoons depict intermediate, active and inactive AT1Rs, respectively, while their overlapping pockets are in light sand, red, and purple and represented by sticks.

**Section 9: The Expression Level of Mutant AT1R Measured by ELISA**

In order to confirm the result of alanine scanning, we applied the whole-cell ELISA assay to determine the cell surface expression levels of AT1R cluster mutants. During the experiment, HEK293 cells were transiently transfected with wild type AT1R or cluster mutants in 24-well plates. After incubation at 37°C for forty-eight hours, cells were incubated with a primary antibody overnight at 4°C and followed by incubation of a secondary anti-rabbit antibody conjugated to horseradish peroxide for 1 h at room temperature. After washing, TMB solution was added and the reaction was stopped by adding HCl solution. The optical density of each well at 450 nm was measured using the TECAN luminescence counter (Infinite M200 Pro NanoQuant). The output expression level is shown in Fig. S9.

As shown in Fig. S9, the mutant AT1Rs are expressed around WT AT1R. The most distinctive cluster 2 leads to a 25% decrease of expression but totally stops the downstream signals. In cluster 4, and 5 with higher expression than WT AT1R, the strength of transducer signals is also cleared in Fig. 9. Thus, our mutations surely impede the activation signals and have the potential to harbor allosteric effects.


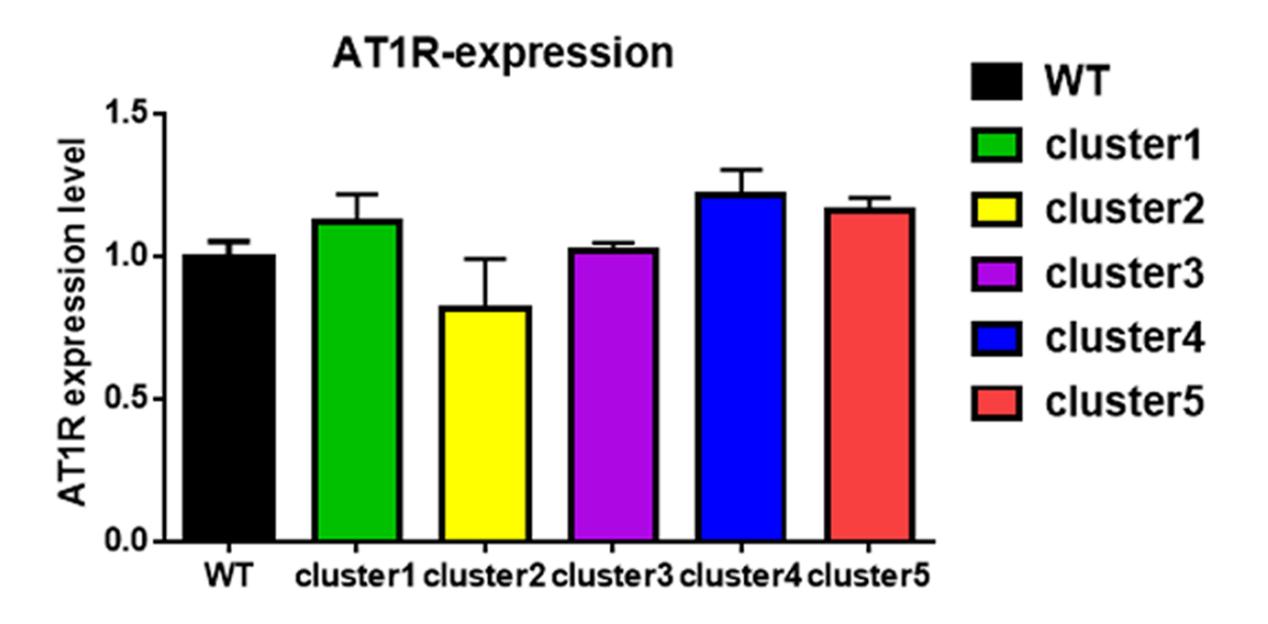


**Fig. S9** The AT1R expression upon mutation cluster 1 (green), 2 (yellow), 3 (purple), 4 (blue), and 5 (red). Standard deviations are shown as black lines. The expression levels of the cluster mutants were normalized to that of the WT AT1R (black).

**References**

1. Pándy-Szekeres, G. *et al.* GPCRdb in 2018: adding GPCR structure models and ligands. *Nucleic Acids Res.* **46**, D440–D446 (2018).

2. Swope, W. C., Pitera, J. W. & Suits, F. Describing Protein Folding Kinetics by Molecular Dynamics Simulations. 1. Theory. *J. Phys. Chem. B* **108**, 6571–6581 (2004).

3. Husic, B. E. & Pande, V. S. Markov State Models: From an Art to a Science. *J. Am. Chem. Soc.* **140**, 2386–2396 (2018).

4. Prinz, J.-H. *et al.* Markov models of molecular kinetics: generation and validation. *J. Chem. Phys.* **134**, 174105 (2011).

5. Scherer, M. K. *et al.* PyEMMA 2: A Software Package for Estimation, Validation, and Analysis of Markov Models. *J. Chem. Theory Comput.* **11**, 5525–5542 (2015).

6. Floyd, R. W. Algorithm 97: shortest path. *Commun. ACM* **5**, 345–345 (1962).

7. Girvan, M. & Newman, M. E. J. Community structure in social and biological networks. *Proc. Natl. Acad. Sci. U. S. A.* **99**, 7821–7826 (2002).

8. Roe, D. R. & Cheatham III, T. E. PTRAJ and CPPTRAJ: software for processing and analysis of molecular dynamics trajectory data. *J. Chem. Theory Comput.* **9**, 3084–3095 (2013).

9. Naritomi, Y. & Fuchigami, S. Slow dynamics in protein fluctuations revealed by time-structure based independent component analysis: the case of domain motions. *J. Chem. Phys.* **134**, 065101 (2011).

10. Suomivuori, C.-M. *et al.* Molecular mechanism of biased signaling in a prototypical G protein-coupled receptor. *Science.* **367**, 881–887 (2020).

11. Maeda, S., Qu, Q., Robertson, M. J., Skiniotis, G. & Kobilka, B. K. Structures of the M1 and M2 muscarinic acetylcholine receptor/G-protein complexes. *Science* **364**, 552–557 (2019).

12. Kang, Y. *et al.* Crystal structure of rhodopsin bound to arrestin by femtosecond X-ray laser. *Nature* **523**, 561–567 (2015).

13. Le Guilloux, V., Schmidtke, P. & Tuffery, P. Fpocket: an open source platform for ligand pocket detection. *BMC Bioinformatics* **10**, 168 (2009).
